# Supplementary material for: Propionate induces intestinal oxidative stress via Sod2 propionylation in zebrafish
Source: PubMed Central journal article supplement — iScience. 2021 May 5;24(6):102515. doi: 10.1016/j.isci.2021.102515 (PMC8188496; doi:10.1016/j.isci.2021.102515), 2021-05-05
Supplement: mmc1.pdf [file mmc1.pdf]

**iScience, Volume 24**

**Supplemental information**

**Propionate induces intestinal**

**oxidative stress via Sod2**

**propionylation in zebrafish**

**Qianwen Ding, Zhen Zhang, Yu Li, Hongliang Liu, Qiang Hao, Yalin Yang, Einar Ringø, Rolf Erik Olsen, Jihong Liu Clarke, Chao Ran, and Zhigang Zhou**

## Supplemental Figures

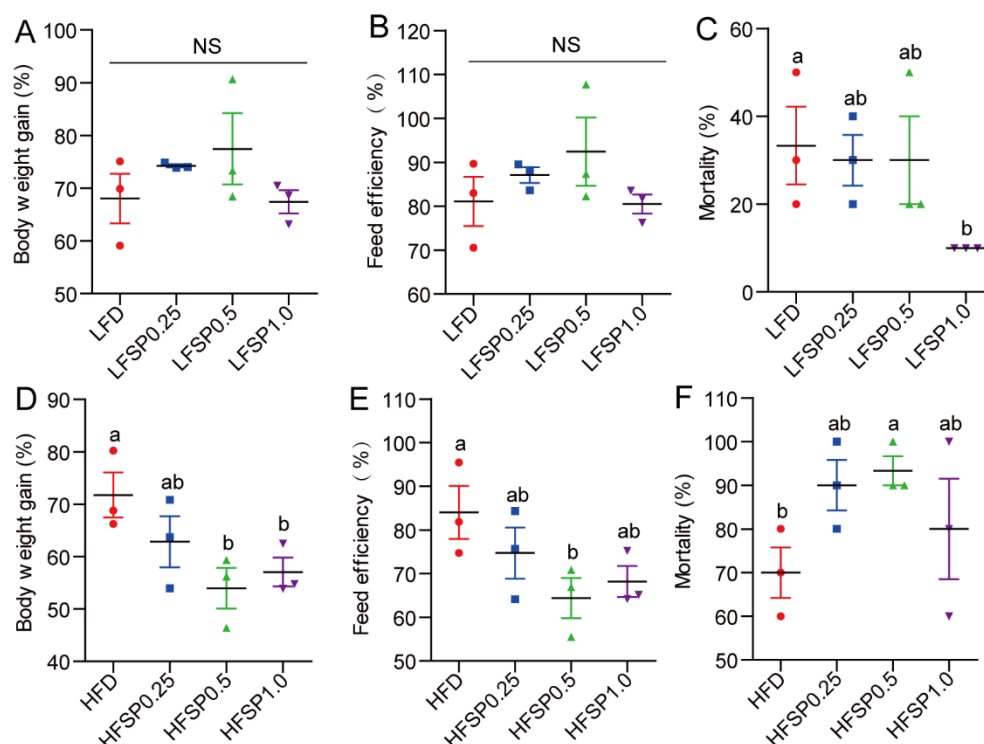

**Figure S1. Growth, feed efficiency and mortality challenged by *Aeromonas veronii* of zebrafish, related to Figure 1.**

(A) Body weight gain of LFD, LFSP0.25, LFSP0.5 and LFSP1.0-fed zebrafish at the end of 2-wk feeding trial (n = 3 tanks, 20 fish/tank).

(B) Feed efficiency of LFD, LFSP0.25, LFSP0.5 and LFSP1.0-fed zebrafish at the end of 2-wk feeding trial (n = 3 tanks, 20 fish/tank).

(C) Mortality of LFD, LFSP0.25, LFSP0.5 and LFSP1.0-fed zebrafish challenged by *Aeromonas veronii* at the end of 2-wk feeding trial (n = 3 tanks, 10 fish/tank).

(D) Body weight gain of HFD, HFSP0.25, HFSP0.5 and HFSP1.0-fed zebrafish at the end of 2-wk feeding trial (n = 3 tanks, 20 fish/tank).

(E) Feed efficiency of HFD, HFSP0.25, HFSP0.5 and HFSP1.0-fed zebrafish at the end of 2-wk feeding trial (n = 3 tanks, 20 fish/tank).

(F) Mortality of HFD, HFSP0.25, HFSP0.5 and HFSP1.0-fed zebrafish challenged by *Aeromonas veronii* at the end of 2-wk feeding trial (n = 3, 10 fish/replicate).

Values are means  $\pm$  SEM. Means without a common letter are significantly different (p < 0.05). NS, not significant. Duncan's test. LFD, low fat diet; LFSP, propionate-supplemented LFD; HFD, high fat diet; HFSP, propionate-supplemented HFD.

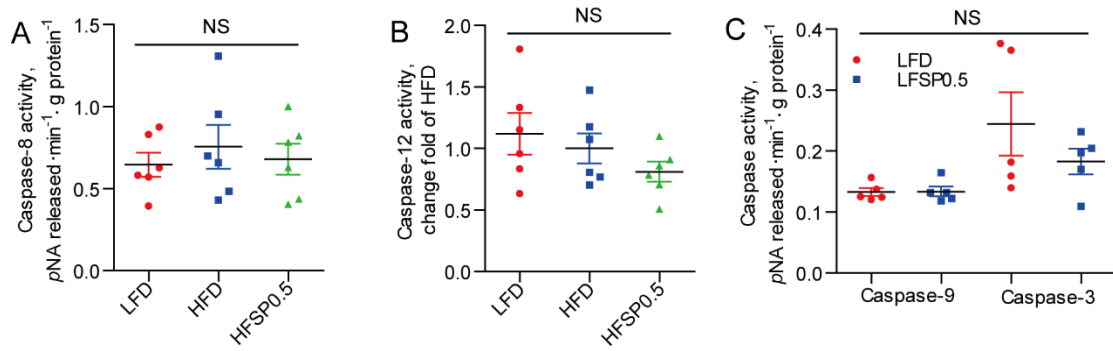

**Figure S2. Caspase activity in the intestinal of zebrafish, related to Figure 1.**

(A) Caspase-8 and (B) caspase-12 activity in one-month-old zebrafish fed LFD, HFD or HFSP0.5 for 2 wks ( $n = 6$ ). (C) Caspase-9 and caspase-3 activity in the intestine of one-month-old zebrafish fed LFD or LFSP0.5 ( $n = 5$ ). Values are means  $\pm$  SEM. NS, not significant. Duncan's test.

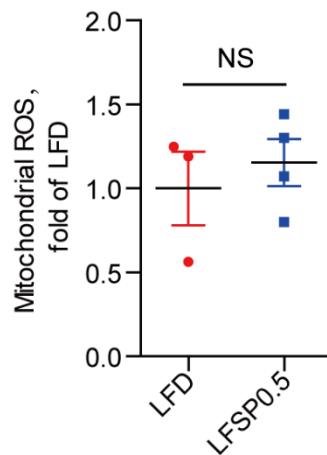

**Figure S3. Mitochondrial ROS in the intestine of one-month-old zebrafish, related to Figure 2.** Mitochondrial ROS in the intestine of zebrafish fed LFD and LFSP0.5 ( $n = 3 - 4$ ). Values are means  $\pm$  SEM. NS, not significant. Student's  $t$ -test.

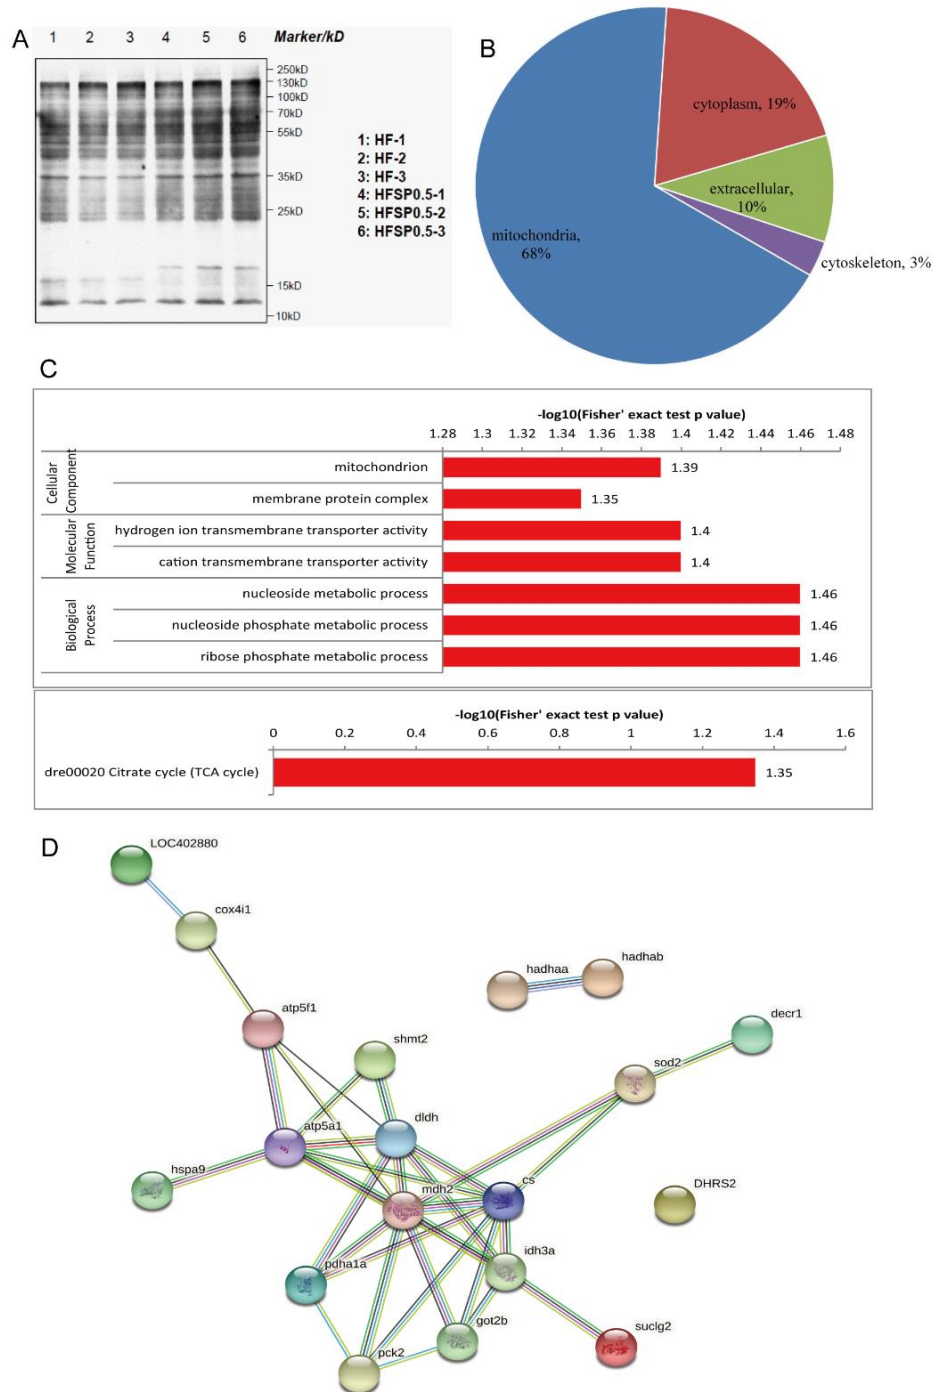

**Figure S4. Propionate induces intestinal mitochondrial protein hyper-propionylation in high fat diet, related to Figure 4.** (A) Immunoblotting validation of Kpro from zebrafish intestine. Lanes 1-3: biological sample of HFD group, lanes 4-6: biological sample of HFSP0.5 group (n = 3). (B) Subcellular distribution of increased lysine-propionylated proteins in zebrafish intestine of HFSP0.5 group compared to HFD group. (C) GO enrichment and KEGG pathway analysis of differentially represented Kpro proteins. (D) STRING analysis revealed mitochondrial Kpro protein interaction networks. Interactions of the identified Kpro proteins were mapped by searching the STRING database with a high confidence value of 0.7.

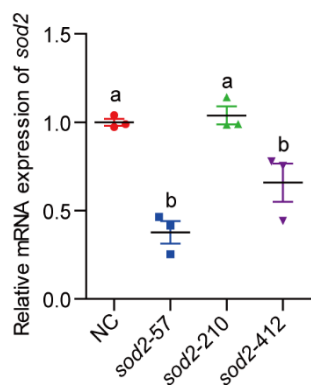

**Figure S5. Efficiency of *sod2* siRNA, related to Figure 5.** Values are means  $\pm$  SEM (n = 3). Means without a common letter are significantly different ( $p < 0.05$ ). Duncan's test. NC, negative control.

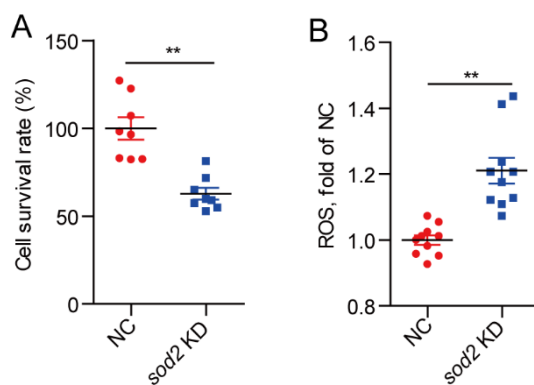

**Figure S6. Cell viability and ROS in ZF4 cells with *sod2* knockdown, related to Figure 5.** Values are means  $\pm$  SEM (n = 8). \*\*,  $p < 0.01$ . Student's *t*-test.

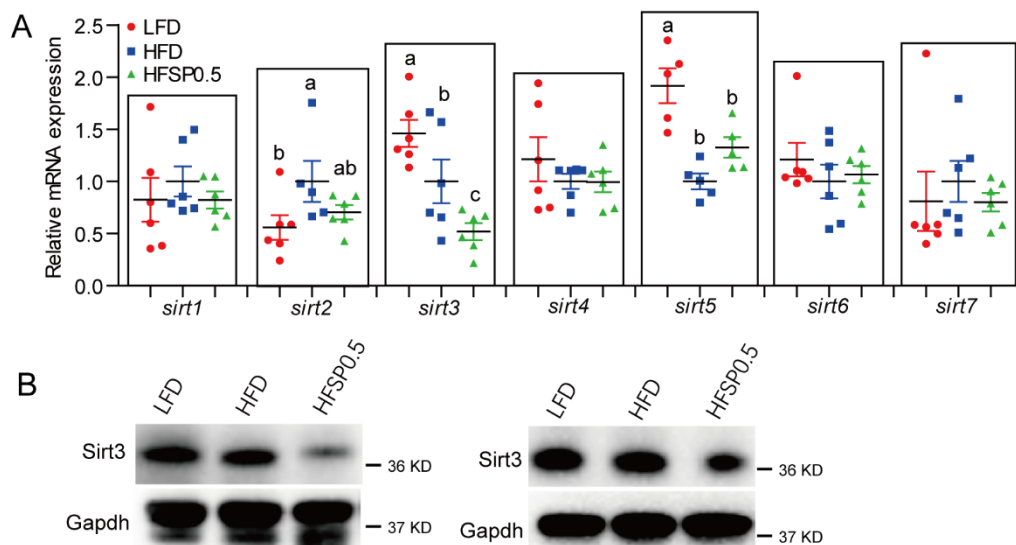

**Figure S7. (A) Intestinal mRNA expression of genes encoding sirtuins and (B) protein expression of Sirt3 in zebrafish fed LFD, HFD or HFSP0.5 diet for 2 wks, related to Figure 6.** Values are means  $\pm$  SEM (n = 5 - 6). Means without a common letter are significantly different ( $p < 0.05$ ). Duncan's test.

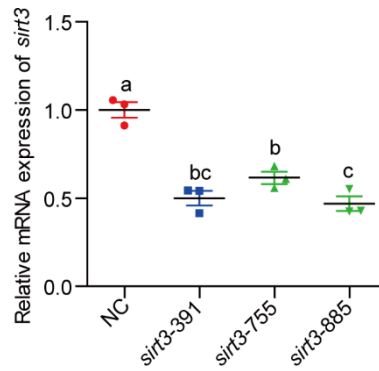

**Figure S8. Efficiency of *sirt3* siRNAs, related to Figure 6.** Values are means  $\pm$  SEM (n = 3). Means without a common letter are significantly different ( $p < 0.05$ ). Duncan's test. NC, negative control.

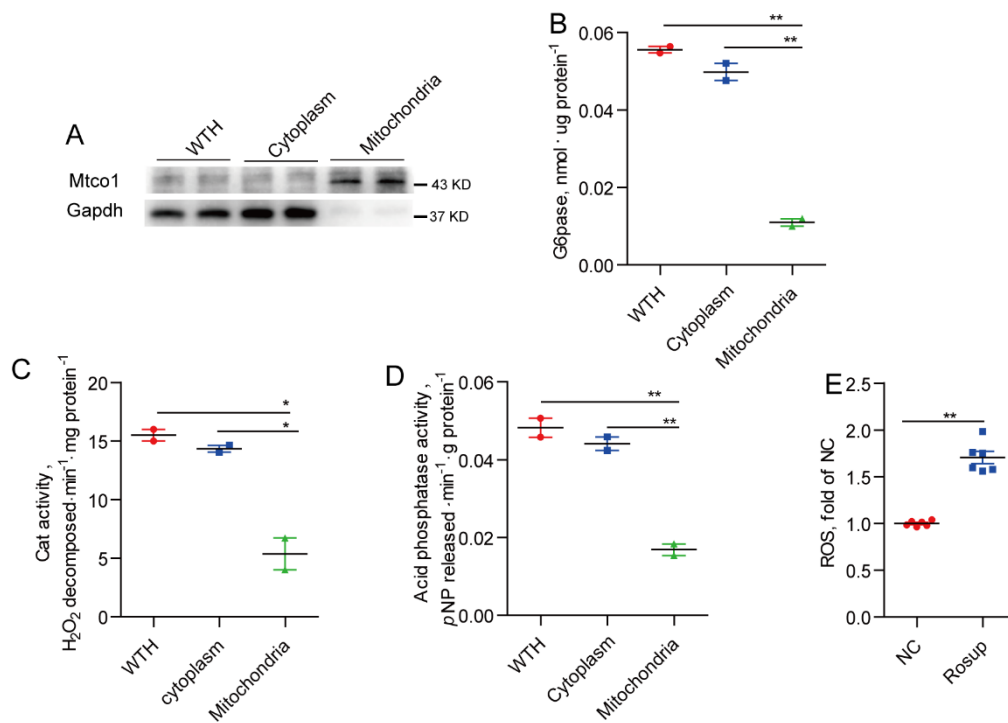

**Figure S9. Positive control and purity assessment of isolated mitochondria, related to STAR Methods.** (A) Mtc01 and Gapdh level in in WTH, cytoplasm and mitochondria fractions. (B) G6pase level in WTH, cytoplasm and mitochondria fractions. (C) Cat activity in WTH, cytoplasm and mitochondria fractions. (D) Acid phosphatase activity in WTH, cytoplasm and mitochondria fractions. (E) ROS generated by isolated mitochondria when stimulated with positive control Rosup. Values are means  $\pm$  SEM (n = 2).\*,  $p < 0.05$ , \*\*,  $p < 0.01$ . Student's *t*-test. WTH, whole tissue homogenate.

## Supplemental Tables

**Table S1.** Ingredient and nutrient composition of low fat experimental diets used for one-month-old zebrafish (dry matter, g/kg), related to STAR Methods.

| Ingredients (g/kg dry diet)    | One-month-old zebrafish |          |         |         |
|--------------------------------|-------------------------|----------|---------|---------|
|                                | LFD                     | LFSP0.25 | LFSP0.5 | LFSP1.0 |
| Casein                         | 400                     | 400      | 400     | 400     |
| Gelatin                        | 100                     | 100      | 100     | 100     |
| Wheat flour                    | 350                     | 350      | 350     | 350     |
| Sodium propionate <sup>1</sup> | 0                       | 2.5      | 5       | 10      |
| Soybean oil                    | 60                      | 60       | 60      | 60      |
| Lard oil                       | 0                       | 0        | 0       | 0       |
| Lysine                         | 3.3                     | 3.3      | 3.3     | 3.3     |
| Ascorbyl phosphater            | 1                       | 1        | 1       | 1       |
| Vitamin premix <sup>2</sup>    | 2                       | 2        | 2       | 2       |
| Mineral premix <sup>3</sup>    | 2                       | 2        | 2       | 2       |
| Dicalcium phosphate            | 20                      | 20       | 20      | 20      |
| Choline chloride               | 2                       | 2        | 2       | 2       |
| Sodium alginate                | 20                      | 20       | 20      | 20      |
| Microcrystalline cellulose     | 39.7                    | 37.2     | 34.7    | 29.7    |
| Total                          | 1000                    | 1000     | 1000    | 1000    |

<sup>1</sup>Sigma;

<sup>2</sup>Vitamin premix (g/kg): thiamine, 0.438; riboflavin, 0.632; pyridoxine-HCl, 0.908; *d*-pantothenic acid, 1.724; nicotinic acid, 4.583; biotin, 0.211; folic acid, 0.549; vitamin B-12, 0.001; inositol, 21.053; menadione sodium bisulfite, 0.889; retinyl acetate, 0.677; cholecalciferol, 0.116; *d*- $\alpha$ -tocopherol-acetate, 12.632;

<sup>3</sup>Mineral premix (g/kg): CoCl<sub>2</sub>·6H<sub>2</sub>O, 0.074; CuSO<sub>4</sub>·5H<sub>2</sub>O, 2.5; FeSO<sub>4</sub>·7H<sub>2</sub>O, 73.2; NaCl, 40.0; MgSO<sub>4</sub>·7H<sub>2</sub>O, 284.0; MnSO<sub>4</sub>·H<sub>2</sub>O, 6.50; KI, 0.68; Na<sub>2</sub>SeO<sub>3</sub>, 0.10; ZnSO<sub>4</sub>·7H<sub>2</sub>O, 131.93; cellulose, 501.09;

LFD, low-fat diet; LFSP0.5, low-fat diet supplemented with 0.5% sodium propionate; HFD, high-fat diet; HFSP0.5, high-fat diet supplemented with 0.5% sodium propionate.

**Table S2.** Ingredient and nutrient composition of the high fat experimental diets used for one-month-old zebrafish (dry matter, g/kg), related to STAR Methods.

| Ingredients (g/kg dry diet)    | One-month-old zebrafish |          |         |         |
|--------------------------------|-------------------------|----------|---------|---------|
|                                | LFD                     | LFSP0.25 | LFSP0.5 | LFSP1.0 |
| Casein                         | 400                     | 400      | 400     | 400     |
| Gelatin                        | 100                     | 100      | 100     | 100     |
| Wheat flour                    | 250                     | 250      | 250     | 250     |
| Sodium propionate <sup>1</sup> | 0                       | 2.5      | 5       | 10      |
| Soybean oil                    | 80                      | 80       | 80      | 80      |
| Lard oil                       | 80                      | 80       | 80      | 80      |
| Lysine                         | 3.3                     | 3.3      | 3.3     | 3.3     |
| Ascorbyl phosphater            | 1                       | 1        | 1       | 1       |
| Vitamin premix <sup>2</sup>    | 2                       | 2        | 2       | 2       |
| Mineral premix <sup>3</sup>    | 2                       | 2        | 2       | 2       |
| Dicalcium phosphate            | 20                      | 20       | 20      | 20      |
| Choline chloride               | 2                       | 2        | 2       | 2       |
| Sodium alginate                | 20                      | 20       | 20      | 20      |
| Microcrystalline cellulose     | 39.7                    | 37.2     | 34.7    | 29.7    |
| Total                          | 1000                    | 1000     | 1000    | 1000    |

<sup>1</sup>Sigma;

<sup>2</sup>Vitamin premix (g/kg): thiamine, 0.438; riboflavin, 0.632; pyridoxine-HCl, 0.908; *α*-pantothenic acid, 1.724; nicotinic acid, 4.583; biotin, 0.211; folic acid, 0.549; vitamin B-12, 0.001; inositol, 21.053; menadione sodium bisulfite, 0.889; retinyl acetate, 0.677; cholecalciferol, 0.116; *d*- $\alpha$ -tocopherol-acetate, 12.632;

<sup>3</sup>Mineral premix (g/kg): CoCl<sub>2</sub>·6H<sub>2</sub>O, 0.074; CuSO<sub>4</sub>·5H<sub>2</sub>O, 2.5; FeSO<sub>4</sub>·7H<sub>2</sub>O, 73.2; NaCl, 40.0; MgSO<sub>4</sub>·7H<sub>2</sub>O, 284.0; MnSO<sub>4</sub>·H<sub>2</sub>O, 6.50; KI, 0.68; Na<sub>2</sub>SeO<sub>3</sub>, 0.10; ZnSO<sub>4</sub>·7H<sub>2</sub>O, 131.93; cellulose, 501.09;

LFD, low-fat diet; LFSP0.5, low-fat diet supplemented with 0.5% sodium propionate; HFD, high-fat diet; HFSP0.5, high-fat diet supplemented with 0.5% sodium propionate.



**Table S5.** siRNA sequences, related to STAR Methods.

|                  | Sense (5'-3')          | Antisense (5'-3')     |
|------------------|------------------------|-----------------------|
| <i>sod2-57</i>   | GCAGAGUCGGAUUAUGUUCGTT | CGAACAUAUCCGACUCUGCTT |
| <i>sod2-210</i>  | GCAAGCACCAUGCAACAUATT  | UAUGUUGCAUGGUGCUUGCTT |
| <i>sod2-412</i>  | GGCCAUAAAGCGUGACUUUTT  | AAAGUCACGCUUUAUGGCCTT |
| <i>sirt3-391</i> | GCAGGCAUCAGCACACCAATT  | UUGGUGUGCUGAUGCCUGCTT |
| <i>sirt3-755</i> | GCAGGAACAGUACCCAAAUTT  | AUUUGGGUACUGUUCCUGCTT |
| <i>sirt3-885</i> | GCACUUCUUCACCUACCUUTT  | AAGGUAGGUGAAGAAGUGCTT |
| Negative control | UUCUCCGAACGUGUCACGUTT  | ACGUGACACGUUCGGAGAATT |

**Table S6.** Quantitative PCR primers, related to STAR Methods.

| Gene                              | Forward primer (5'–3')          | Reverse primer (5'–3')           |
|-----------------------------------|---------------------------------|----------------------------------|
| <i>rps11</i>                      | ACAGAAATGCCCTTCACTG             | GCCTCTTCTCAAACGGTTG              |
| <i>sirt3</i>                      | CATTAATGTGGTGAACAA<br>GAGGCCTG  | AGTTCCTCTCCTTTGTAATC<br>CCTCCGAC |
| <i>sod2</i>                       | ATGCTGTGCAGAGTCGGATA<br>TG      | GCTGAAGGGAGACTTGGGT<br>T         |
| <i>claudin-15</i>                 | CTCTGCTCGCTCTATCTGGT<br>TA      | TTTCACGGGTGGGATGGTAT             |
| <i>occludin</i>                   | GGCTCCTATGCTGGTTCCTA            | AACTTCCTGCCCTGAGACA<br>CT        |
| <i>sirt1</i>                      | CCAAACGAAAGAAACGCAA<br>AGA      | CACAGGAAACAGACACCCC<br>AG        |
| <i>sirt2</i>                      | AGAAGTACAACCTGCCTTAC<br>C       | CTTTCCCCAAAAACACAAT<br>A         |
| <i>sirt4</i>                      | TTTCTTCGCACCAGCCTAAC            | CACAGTCCAAACACACAAC<br>CC        |
| <i>sirt5</i>                      | CCACGGTAGTCTGTTTAAAA<br>CCCGCTG | AGTGATATTTGAAGCGTTGG<br>GTAGCAGG |
| <i>sirt6</i>                      | CTACAGGCATACCCGACTTC<br>A       | CCATCACTCCGACCACCG               |
| <i>sirt7</i>                      | GCTGTGATGGCTCTGTTGAT            | GCGGACTGAGGGGTTTAG               |
| <i>Universal bacteria</i>         | CCTACGGGAGGCAGCAG               | ATTACCGCGGCTGCTGG                |
| <i>Fusobacteria</i><br>(phylum)   | KGGGCTCAACMCMGTATTG<br>CGT      | TCGCGTTAGCTTGGGCGCT<br>G         |
| <i>Proteobacteria</i><br>(phylum) | TCGTCAGCTCGTGTYGTGA             | CGTAAGGGCCATGATG                 |
| <i>Firmicutes</i><br>(phylum)     | GGAGYATGTGGTTTAATTCG<br>AAGCA   | AGCTGACGACAACCATGCA<br>C         |
| <i>Cetobacterium</i><br>(genus)   | AGTTTGATCCTGGCTCAGGA<br>TG      | GAGGCAAGTTCCTTACGCG<br>TT        |
| <i>Plesiomonas</i><br>(genus)     | CTCCGAATACCGTAGAGTGC<br>TATCC   | CTCCCCTAGCCCAATAACAC<br>CTAAA    |
| <i>Aeromonas</i><br>(genus)       | GAAGGCCAAGTCGGCCGCC<br>AG       | ATCTTGGCACGCCCGGGTT<br>TTC       |
